# Supplementary material
Source: MDPI journal article supplement (https://www.mdpi.com/2073-4433/12/11/1538)
Supplement: s1 [file s1]

Supplementary Materials:

# A Multi-Site Evaluation of Winter Hardiness in Indigenous Alfalfa Cultivars in Northern China

Lijun Xu <sup>1</sup>, Qian Liu <sup>2</sup>, Yingying Nie <sup>1</sup>, Feng Li <sup>3</sup>, Guixia Yang <sup>1</sup>, Ya Tao <sup>3,\*</sup>, Shijie Lv <sup>4,\*</sup>, Xinjia Wu <sup>1</sup>  
and Liming Ye <sup>1,5,\*</sup>

<sup>1</sup> Chinese Academy of Agricultural Sciences, Institute of Agricultural Resources and Regional Planning/Hulunbuir Grassland Ecosystem Research Station, Beijing 100081, China; xulijun@caas.cn (L.X.); nieyingying0908@126.com (Y.N.); yangguixia@caas.cn (G.Y.); wuxinjie995@126.com (X.W.)

<sup>2</sup> Institute of Animal Husbandry and Veterinary Sciences, Liangshan Yi Autonomous Prefecture, Sichuan 615042, China; liuqianxichang@163.com

<sup>3</sup> Institute of Grassland Research, Chinese Academy of Agricultural Sciences, Inner Mongolia 010010, China; lifeng03@caas.cn

<sup>4</sup> Science College, Inner Mongolia Agricultural University, Inner Mongolia 010018, China

<sup>5</sup> Department of Geology, Ghent University, 9000 Gent, Belgium

\* Correspondence: taoya@caas.cn (Y.T.); lshj123@imau.edu.cn (S.L.); liming.ye@ugent.be (L.Y.)

**Table S1.** List of 50 indigenous Chinese alfalfa cultivars used in the field experiment.

| SN <sup>1</sup> | Cultivar      | ASI  | Source                                                                             |
|-----------------|---------------|------|------------------------------------------------------------------------------------|
| 1               | Gongnong-1    | 0.6  | Jilin Academy of Agricultural Sciences                                             |
| 2               | Xinmu-1       | 1.1  | Xinjiang Agricultural University                                                   |
| 3               | Caoyuan-2     | 2.9  | Inner Mongolia Agricultural University (IMAU)                                      |
| 4               | Caoyuan-3     | 0.7  | IMAU                                                                               |
| 5               | Gongnong-5    | 0.1  | Jilin Academy of Agricultural Sciences                                             |
| 6               | Caribou       | 1.7  | Beijing Clover-Seeds, Inc.                                                         |
| 7               | Nongmu-801    | 0.1  | Institute of Animal Husbandry, Helongjiang Academy of Agricultural Sciences (HAAS) |
| 8               | Zhaodong      | 0.2  | Institute of Animal Husbandry, HAAS                                                |
| 9               | Zhongmu-1     | 2.1  | Institute of Animal Science, Chinese Academy of Agricultural Sciences (CAAS)       |
| 10              | Zhongmu-5     | 1.5  | Institute of Animal Science, CAAS                                                  |
| 11              | Zhongmu-3     | 2.6  | Institute of Animal Science, CAAS                                                  |
| 12              | Xinjiang Daye | -    | Tarim University                                                                   |
| 13              | Zhonglan-1    | 3.9  | Institute of Animal Science, CAAS                                                  |
| 14              | Zhongcao-3    | 1.4  | Grassland Research Institute, CAAS                                                 |
| 15              | Zhungeer      | 1.4  | Grassland Research Institute, CAAS                                                 |
| 16              | Xinmu-2       | 1.7  | Xinjiang Agricultural University                                                   |
| 17              | Vernal        | 2.3  | Beijing Rytway Ecotechnology Co., Ltd (BREC)                                       |
| 18              | Legend        | 4    | BREC                                                                               |
| 20              | Maverick      | 0.9  | BREC                                                                               |
| 22              | UC-1465       | 10.6 | BREC                                                                               |
| 23              | 5246          | 3.3  | BREC                                                                               |
| 26              | UC-1887       | 9.5  | BREC                                                                               |
| 27              | ABI700        | 6.2  | BREC                                                                               |
| 29              | DonaAna       | 6.9  | BREC                                                                               |
| 31              | Pierce        | 8.2  | BREC                                                                               |
| 32              | WL903         | 9.3  | BREC                                                                               |
| 33              | WL525HQ       | 8.1  | BREC                                                                               |
| 34              | WL363HQ       | 6.0  | BREC                                                                               |

|    |            |     |                                                                                                                         |
|----|------------|-----|-------------------------------------------------------------------------------------------------------------------------|
| 35 | WL712      | 9.5 | BREC                                                                                                                    |
| 36 | WL656HQ    | 9.0 | BREC                                                                                                                    |
| 37 | WL440HQ    | 5.5 | BREC                                                                                                                    |
| 38 | WL343HQ    | 5.3 | BREC                                                                                                                    |
| 39 | WL319HQ    | 4.1 | BREC                                                                                                                    |
| 40 | Gongnong-5 | 8.0 | Gansu Agricultural University                                                                                           |
| 41 | Liangmu-1  | 8.2 | Liangshan Bureau of Animal Husbandry                                                                                    |
| 42 | Rambler    | 0.1 | Grassland Research Institute, CAAS                                                                                      |
| 43 | Lumu-1     | 1.4 | Shandong Academy of Agricultural Sciences                                                                               |
| 44 | Aohan      | 0.9 | Linxi County Grassland Workstation                                                                                      |
| 45 | Victorian  | 4.3 | Grassland Research Institute, CAAS                                                                                      |
| 46 | WL168HQ    | 1.9 | BREC                                                                                                                    |
| 47 | 54V09      | 4.5 | DLF China                                                                                                               |
| 48 | 55V12      | 5.5 | DLF                                                                                                                     |
| 49 | 55V48      | 5.7 | DLF China                                                                                                               |
| 50 | 56S82      | 5.8 | DLF China                                                                                                               |
| 51 | Target     | 4.9 | National Feed Engineering Technology Research Center (NFC) and Forage<br>and Silage Research and Promotion Center (FSC) |
| 52 | Adrenalin  | 4.4 | NFC & FSC                                                                                                               |
| 53 | Huaiyin    | 1.6 | Yangzhou University                                                                                                     |
| 54 | Yumu-1     | 6.7 | Southwest University                                                                                                    |
| 55 | Concept    | 3.8 | NFC & FSC                                                                                                               |
| 56 | Knight02   | 3.5 | NFC & FSC                                                                                                               |

<sup>1</sup> SN: Serial number.
